# Supplementary material for: Increased Methylation of Brain-Derived Neurotrophic Factor (BDNF) Is Related to Emotionally Unstable Personality Disorder and Severity of Suicide Attempt in Women
Source: MDPI journal article supplement (doi:10.3390/cells12030350), 2023-01-17
Supplement: s1 [file s1]

## Supplementary Figures

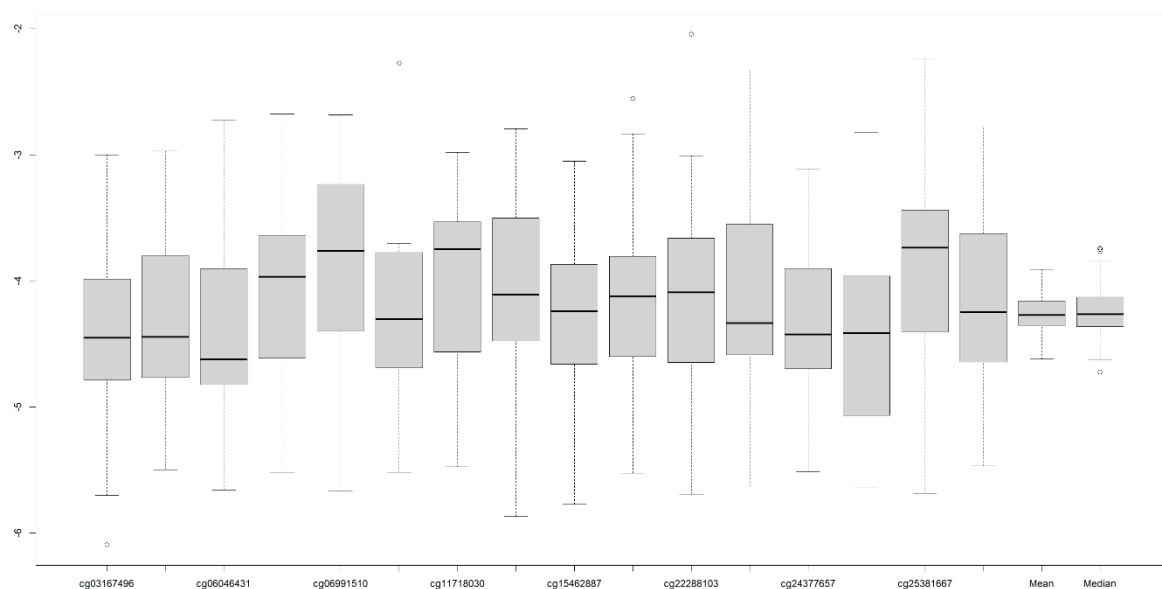

**Supplementary Figure S1.** Boxplots DNA methylation M-values for BDNF-coupled CpG-sites, their Median and Mean in the Discovery Group. Comparison of M-transformed methylation levels for independent BDNF-coupled CpG-sites, their median and mean in the Discovery group.

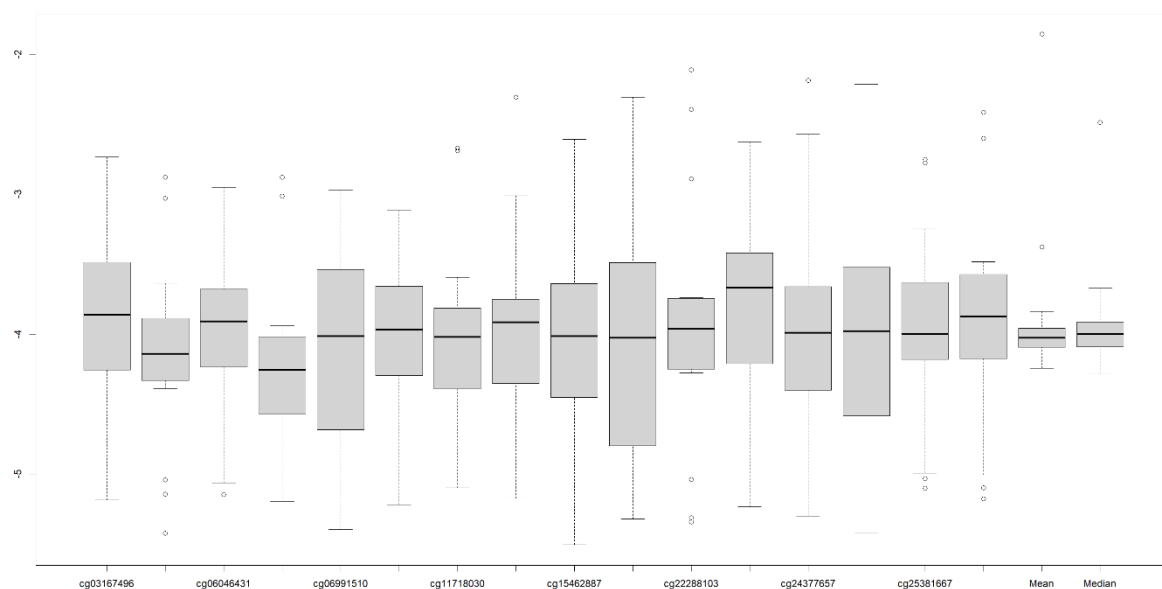

**Supplementary Figure S2.** Boxplots DNA methylation M-values for BDNF-coupled CpG-sites, their Median and Mean in the Validation Group. Comparison of M-transformed

methylation levels for independent BDNF-coupled CpG-sites, their median and mean in the Validation group.
